# Supplementary material
Source: Elsevier journal article supplement (https://www.sciencedirect.com/science/article/pii/S0366317521000170)
Supplement: mmc1 [file S0366317521000170:mmc1.docx]

**Supplementary data**


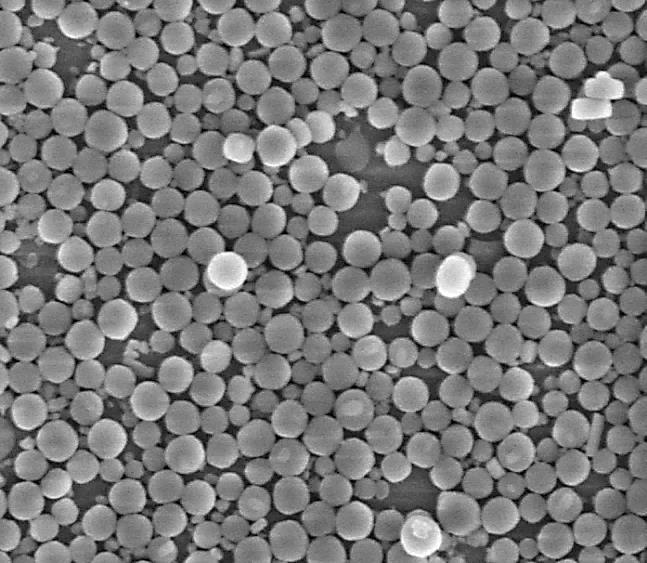

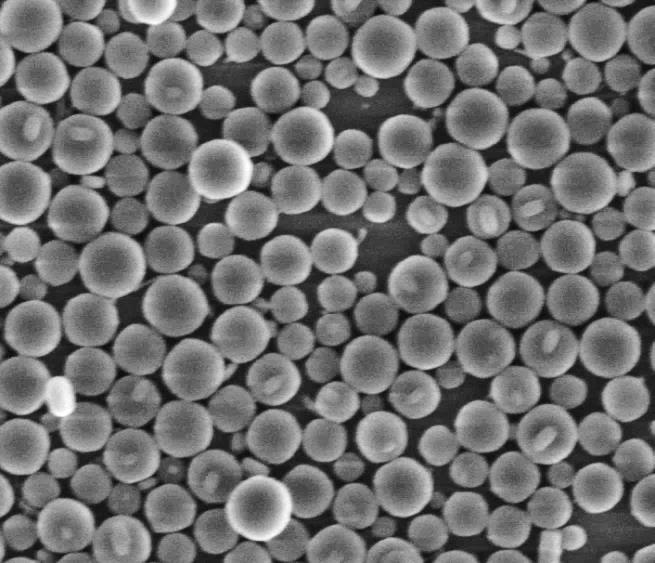


**1 µm**

**SS24**

**SS36**

**1 µm**

**SS48**

**SS62**

**1 µm**

**1 µm**

**1 µm**

**SS88**


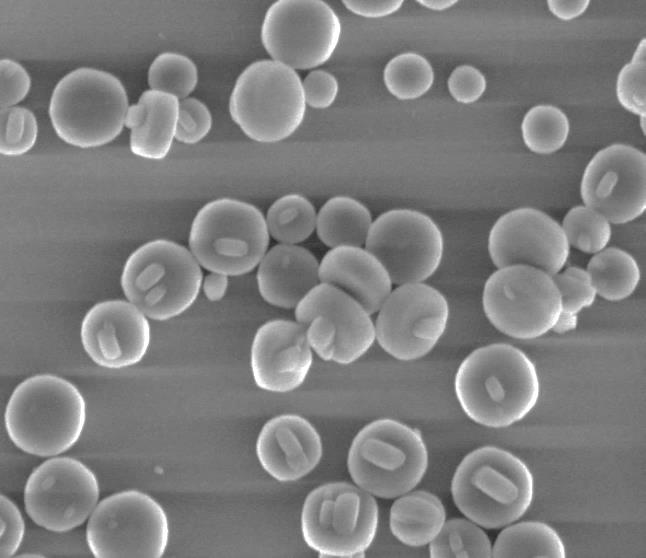

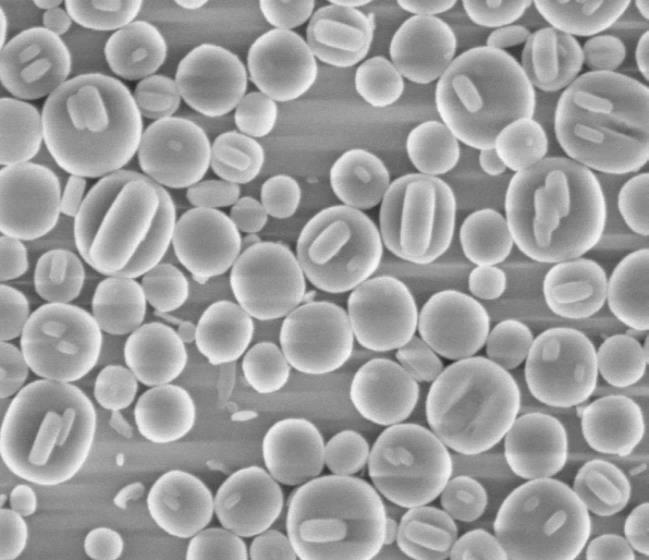


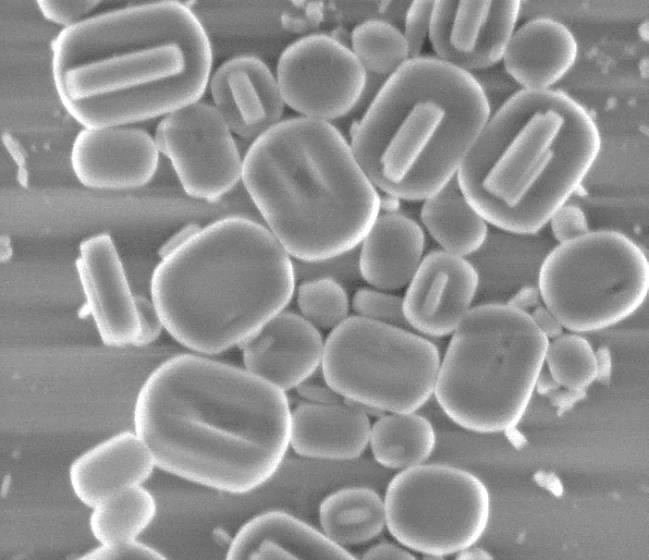


Figure 1.S. SEM image of oriented samples coated on the glass plate.
